# Supplementary material for: Reflectance Spectroscopy with Multivariate Methods for Non-Destructive Discrimination of Edible Oil Adulteration
Source: MDPI journal article supplement (doi:10.3390/bios11120492), 2021-12-02
Supplement: s1 [file s1]

# Supplementary material: Reflectance spectroscopy with multivariate methods for non-destructive discrimination of edible oil adulteration

Ning Su <sup>1,2</sup>, Shizhuang Weng<sup>3</sup>, Liusan Wang <sup>1,2\*</sup> and Taosheng Xu<sup>1,2</sup>

<sup>1</sup> Institute of Intelligent Machines, Hefei Institutes of Physical Science, Chinese Academy of Sciences, Hefei 230031, China

<sup>2</sup> Intelligent Agriculture Engineering Laboratory of Anhui Province, China, Hefei 230031, China

<sup>3</sup> National Engineering Research Center for Agro-Ecological Big Data Analysis and Application, Anhui University, Hefei 230601, China

**Table S1.** The effective wavelengths screened by CARS in adulteration experiment of sesame oil and soybean oil.

| Method | Number | wavelengths                                                                                                                                                                                                                                                                                                                                                                                                                                                                                                                                                                      |
|--------|--------|----------------------------------------------------------------------------------------------------------------------------------------------------------------------------------------------------------------------------------------------------------------------------------------------------------------------------------------------------------------------------------------------------------------------------------------------------------------------------------------------------------------------------------------------------------------------------------|
| PCA    | 83     | 402, 524, 749, 856, 957, 1085, 1233, 1379, 1535, 1639, 1772, 1895, 2064, 2236, 2362, 2491, 353, 464, 610, 766, 870, 971, 1113, 1350, 1600, 1744, 1906, 2021, 2123, 2237, 2346, 2479, 454, 571, 673, 820, 925, 1030, 1150, 1356, 1520, 1626, 1763, 1878, 2062, 2170, 2360, 2470, 353, 458, 578, 692, 884, 985, 1094, 1205, 1400, 1516, 1652, 1757, 1863, 1979, 2093, 2210, 2325, 2426, 355, 464, 582, 687, 876, 980, 1130, 1234, 1364, 1479, 1653, 1785, 1903, 2011, 2162, 2308, 2496                                                                                             |
| SPA    | 97     | 2157, 1359, 2133, 972, 1007, 943, 2019, 973, 2141, 2069, 2484, 1881, 2394, 2123, 398, 2284, 2315, 2234, 391, 687, 924, 1574, 1895, 2337, 2469, 974, 2446, 2343, 2146, 2330, 1848, 2323, 2364, 2493, 2388, 1890, 2464, 2093, 2413, 2418, 386, 1898, 2296, 2149, 2104, 1873, 2180, 2397, 2454, 2164, 2261, 1878, 2306, 2422, 380, 1841, 2403, 2226, 2474, 2431, 2425, 2409, 370, 2246, 2064, 2056, 982, 2120, 2195, 2096, 2355, 2117, 2185, 358, 1868, 1046, 2218, 355, 2371, 2488, 2435, 375, 2136, 366, 361, 916, 1941, 2221, 363, 2200, 2380, 2083, 350, 2500, 2239, 2268, 2350 |
| VIP    | 90     | 530, 525, 524, 531, 529, 526, 523, 532, 528, 527, 522, 533, 534, 521, 535, 520, 517, 518, 519, 538, 537, 536, 539, 516, 540, 541, 515, 543, 542, 544, 514, 545, 513, 546, 512, 547, 511, 510, 548, 549, 509, 550, 551, 508, 507, 552, 553, 554, 506, 555, 556, 505, 557, 504, 558, 503, 559, 502, 560, 501, 561, 562, 500, 563, 499, 564, 498, 565, 497, 566, 567, 496, 568, 495, 569, 494, 570, 493, 571, 572, 492, 573, 491, 574, 575, 490, 576, 489, 577, 488                                                                                                                 |
| CARS   | 94     | 353, 417, 418, 530, 531, 532, 538, 546, 737, 738, 740, 742, 743, 744, 745, 746, 747, 888, 890, 944, 965, 966, 972, 1006, 1007, 1008, 1153, 1160, 1161, 1162, 1163, 1164, 1165, 1481, 1482, 1483, 1484, 1515, 1544, 1545, 1546, 1547, 1907, 1916, 1917, 1926, 1927, 2005, 2006, 2007, 2082, 2083, 2091, 2099, 2100, 2109, 2114, 2124, 2125, 2126, 2127, 2128, 2131, 2132, 2136, 2137, 2141, 2148, 2149, 2152, 2153, 2154, 2229, 2236, 2266, 2267, 2278, 2279, 2280, 2297, 2316, 2323, 2338, 2344, 2345, 2354, 2355, 2356, 2387, 2394, 2403, 2404, 2475, 2486                      |

**Table S2.** The effective wavelengths screened by CARS in adulteration experiment of rapeseed oil and soybean oil.

| Method | Number | wavelengths                                                                                                                                                                                                                                                                                                                                                                                                                                                                                                                                                                                                                                                                                                                                                                                                                                            |
|--------|--------|--------------------------------------------------------------------------------------------------------------------------------------------------------------------------------------------------------------------------------------------------------------------------------------------------------------------------------------------------------------------------------------------------------------------------------------------------------------------------------------------------------------------------------------------------------------------------------------------------------------------------------------------------------------------------------------------------------------------------------------------------------------------------------------------------------------------------------------------------------|
| PCA    | 98     | 396, 506, 661, 763, 867, 1011, 1113, 1249, 1355, 1535, 1744, 1848, 1961, 2064, 2201, 2385, 2488, 363, 530, 633, 758, 917, 1026, 1147, 1254, 1355, 1498, 1608, 1759, 1872, 2026, 2219, 2323, 2438, 354, 481, 585, 715, 879, 980, 1152, 1355, 1531, 1647, 1752, 1890, 2064, 2170, 2304, 2436, 352, 454, 585, 698, 799, 985, 1153, 1279, 1394, 1661, 1865, 2064, 2195, 2361, 2494, 369, 546, 678, 825, 929, 1039, 1235, 1339, 1461, 1637, 1776, 1896, 2062, 2238, 2342, 2489                                                                                                                                                                                                                                                                                                                                                                              |
| SPA    | 81     | 507, 1761, 1999, 1866, 2389, 2189, 2393, 2378, 2415, 2203, 2303, 2448, 2149, 2216, 2263, 2143, 2059, 379, 2252, 362, 2018, 1881, 2126, 2056, 2072, 2053, 2400, 375, 2269, 2090, 2373, 2345, 2316, 2488, 2340, 2180, 2077, 2112, 2479, 2040, 2185, 2242, 2473, 2233, 2228, 2286, 2350, 2105, 1974, 2332, 2277, 1842, 2171, 2146, 2247, 2442, 2097, 2153, 2132, 1862, 2163, 2027, 2194, 2499, 2198, 696, 2433, 2325, 2292, 2123, 2064, 2037, 1905, 2320, 1719, 1898, 352, 2468, 2298, 2367, 2408, 367, 2423, 1648, 2115, 2094, 2208, 1957, 1874, 2458, 2310, 2212, 2139, 2136, 2157, 2220, 2080, 2358                                                                                                                                                                                                                                                    |
| VIP    | 90     | 516, 515, 517, 514, 513, 512, 518, 511, 519, 510, 520, 509, 521, 508, 522, 507, 523, 506, 524, 525, 505, 526, 504, 527, 503, 502, 534, 532, 535, 528, 501, 533, 536, 531, 529, 530, 537, 500, 499, 538, 498, 497, 496, 495, 494, 490, 491, 493, 489, 488, 486, 487, 492, 485, 539, 484, 482, 481, 483, 480, 477, 478, 479, 540, 476, 475, 474, 541, 473, 472, 470, 471, 469, 468, 542, 464, 467, 465, 466, 463, 462, 543, 459, 461, 460, 458, 457, 456, 455, 544                                                                                                                                                                                                                                                                                                                                                                                       |
| CARS   | 144    | 350, 354, 368, 374, 375, 381, 497, 498, 499, 500, 517, 521, 522, 524, 525, 527, 528, 530, 531, 532, 535, 536, 537, 538, 539, 540, 541, 542, 545, 692, 695, 698, 708, 887, 889, 966, 968, 970, 972, 979, 1053, 1138, 1139, 1140, 1141, 1142, 1143, 1147, 1148, 1149, 1155, 1156, 1157, 1158, 1159, 1160, 1161, 1237, 1238, 1239, 1240, 1241, 1242, 1263, 1264, 1265, 1266, 1490, 1491, 1492, 1502, 1507, 1508, 1509, 1510, 1537, 1538, 1539, 1540, 1641, 1642, 1643, 1644, 1645, 1646, 1648, 1649, 1650, 1651, 1652, 1842, 1843, 1865, 1866, 1903, 1904, 1929, 1930, 1931, 1939, 1946, 1968, 1969, 2036, 2037, 2060, 2061, 2069, 2074, 2075, 2076, 2137, 2138, 2145, 2146, 2164, 2165, 2172, 2180, 2181, 2182, 2183, 2220, 2221, 2222, 2236, 2237, 2238, 2239, 2329, 2340, 2341, 2349, 2350, 2401, 2408, 2422, 2431, 2432, 2440, 2441, 2462, 2463, 2477 |
